# Supplementary material
Source: Elsevier journal article supplement (https://comptes-rendus.academie-sciences.fr/chimie/article/10.1016/j.crci.2015.07.001/file/attach/mmc1.pdf)
Supplement: mmc1 [file mmc1.pdf]

## Supporting information:

### **Solid state NMR of salivary calculi: proline-rich salivary proteins, citrate, polysaccharide, lipid, and organic-mineral interactions.**

Yang Li<sup>a</sup>, David G. Reid<sup>a</sup>, Dominique Bazin<sup>b,c</sup>, Michel Daudon<sup>d</sup>, Melinda J. Duer<sup>a</sup>

<sup>a</sup> Department of Chemistry, University of Cambridge, Lensfield Rd., Cambridge CB2 1EW, UK.

<sup>b</sup> Laboratoire de Physique des Solides, CNRS, Université Paris-Sud, 91405 Orsay, France.

<sup>c</sup> Laboratoire de Chimie de la Matière Condensée de Paris Université Pierre et Marie Curie et Collège de France, 11 place Marcelin Berthelot, 75231 Paris cedex 05, France.

<sup>d</sup> APHP, Hôpital Tenon, Service d' Explorations Fonctionnelles, 4 rue de la Chine, 75020 Paris, France.

|                                                                                                     |        |
|-----------------------------------------------------------------------------------------------------|--------|
| <b>Fig. S1</b> Overlays of the <sup>31</sup> P spectra of all eight stones                          | Page 2 |
| <b>Fig. S2</b> Overlays of the <sup>13</sup> C spectra of all eight stones                          | Page 3 |
| <b>Fig. S3</b> Overlays of the dipolar dephased (DD) spectra of all eight stones                    | Page 4 |
| <b>Fig. S4</b> Overlays of the <sup>13</sup> C{ <sup>31</sup> P} REDOR datasets of all eight stones | Page 5 |
| <b>Table S1</b> Measured amino acid composition from two analyses per stone                         | Page 6 |
| <b>Notes</b> summarizing compositional data (by FT-IR), and NMR results                             | Page 7 |

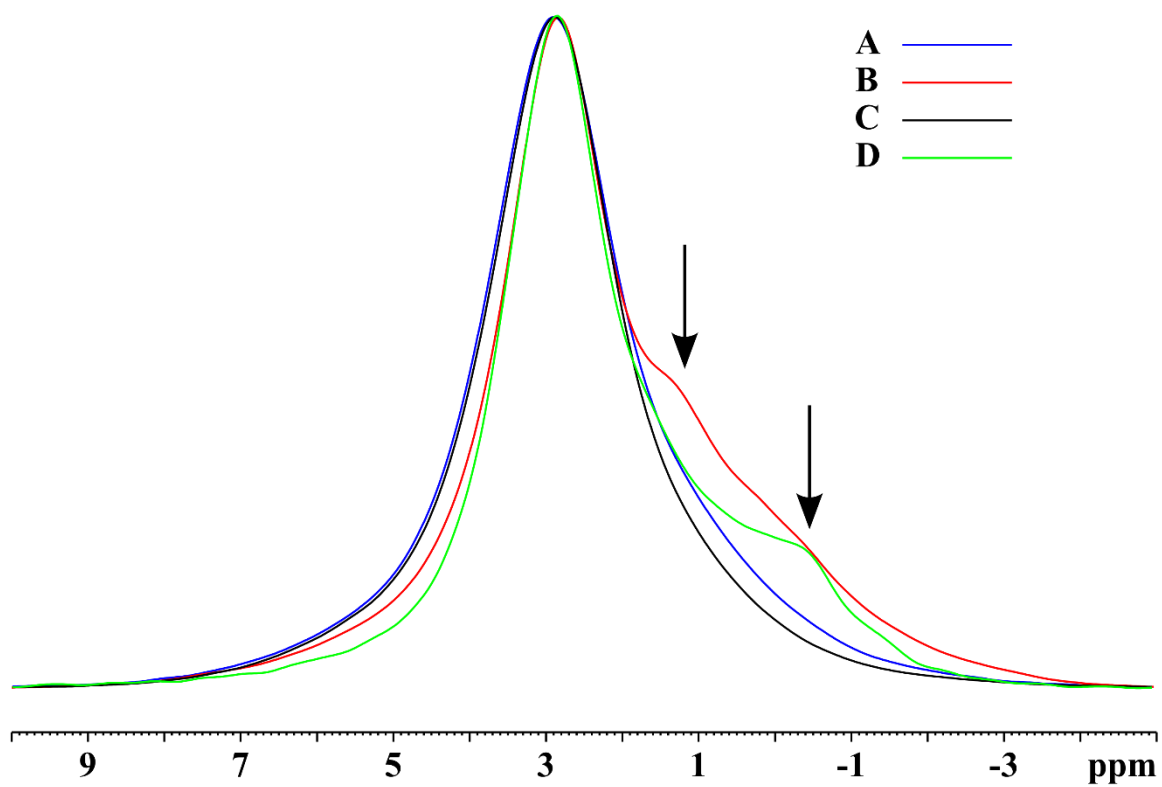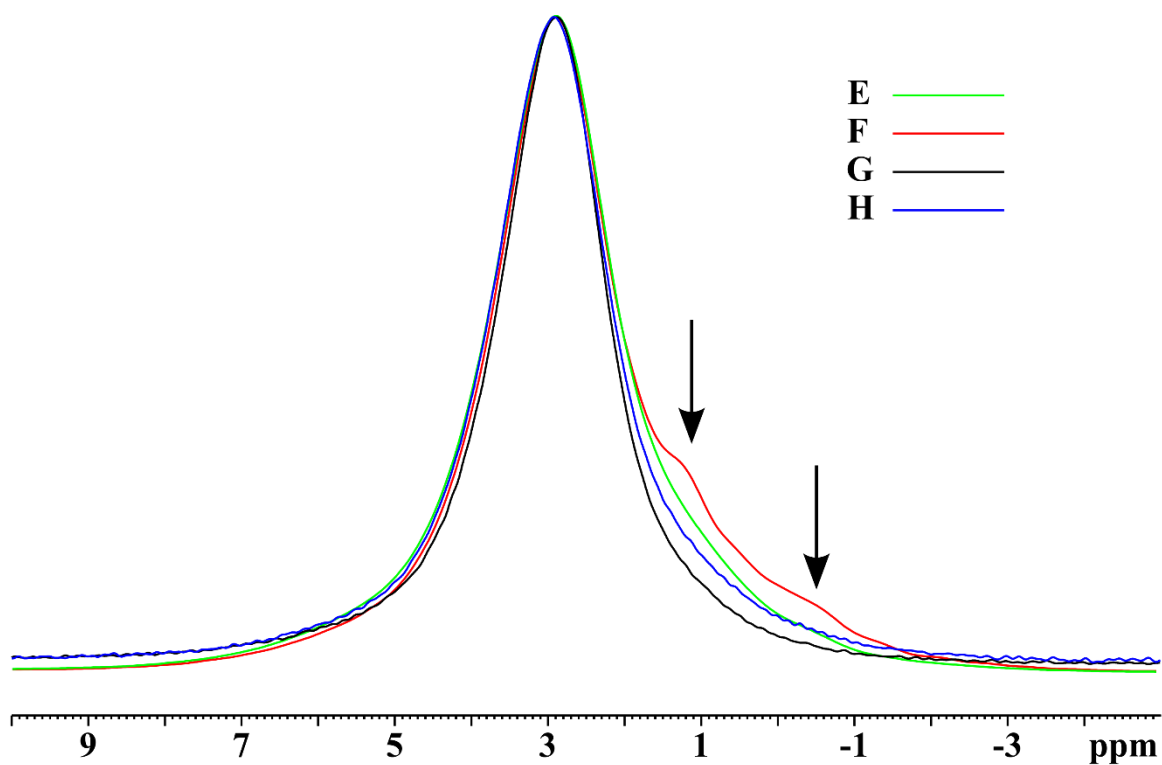

**Fig. S1** Overlays of the  $^{31}\text{P}$  spectra of all eight stones. Arrows denote the shoulders discussed in the text.

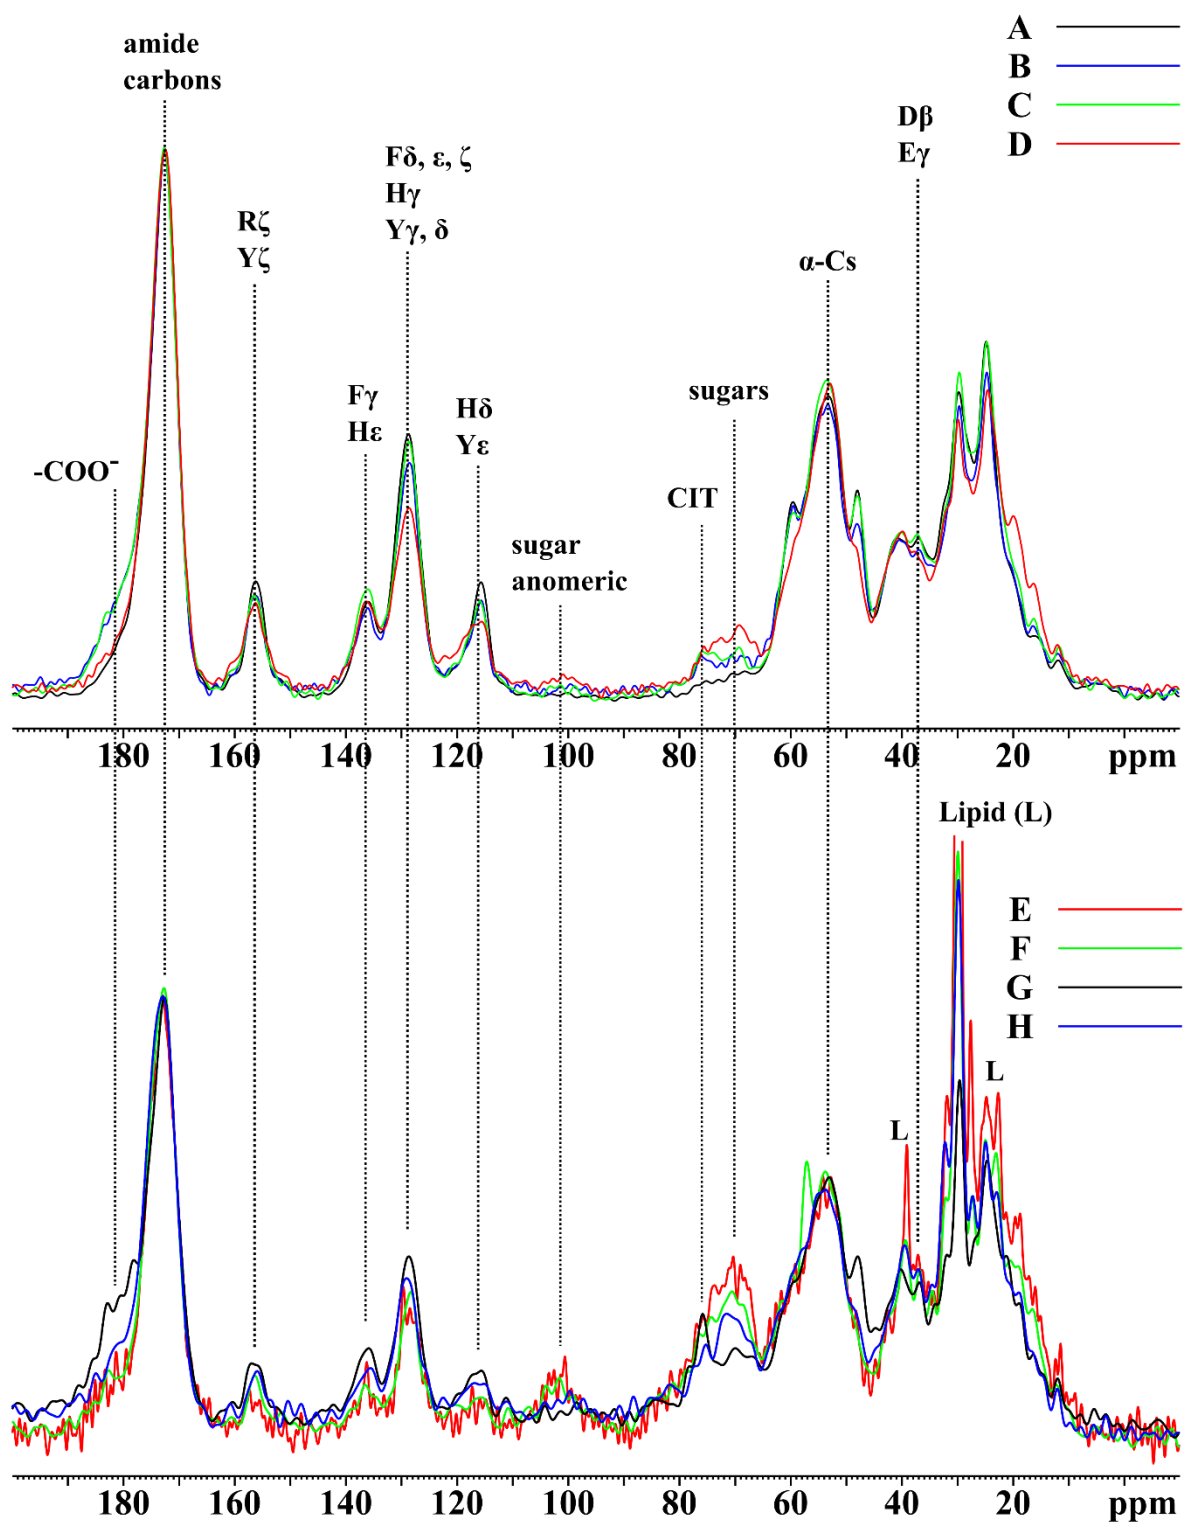

Fig. S2 Overlays of the  $^{13}\text{C}$  spectra of all eight stones.

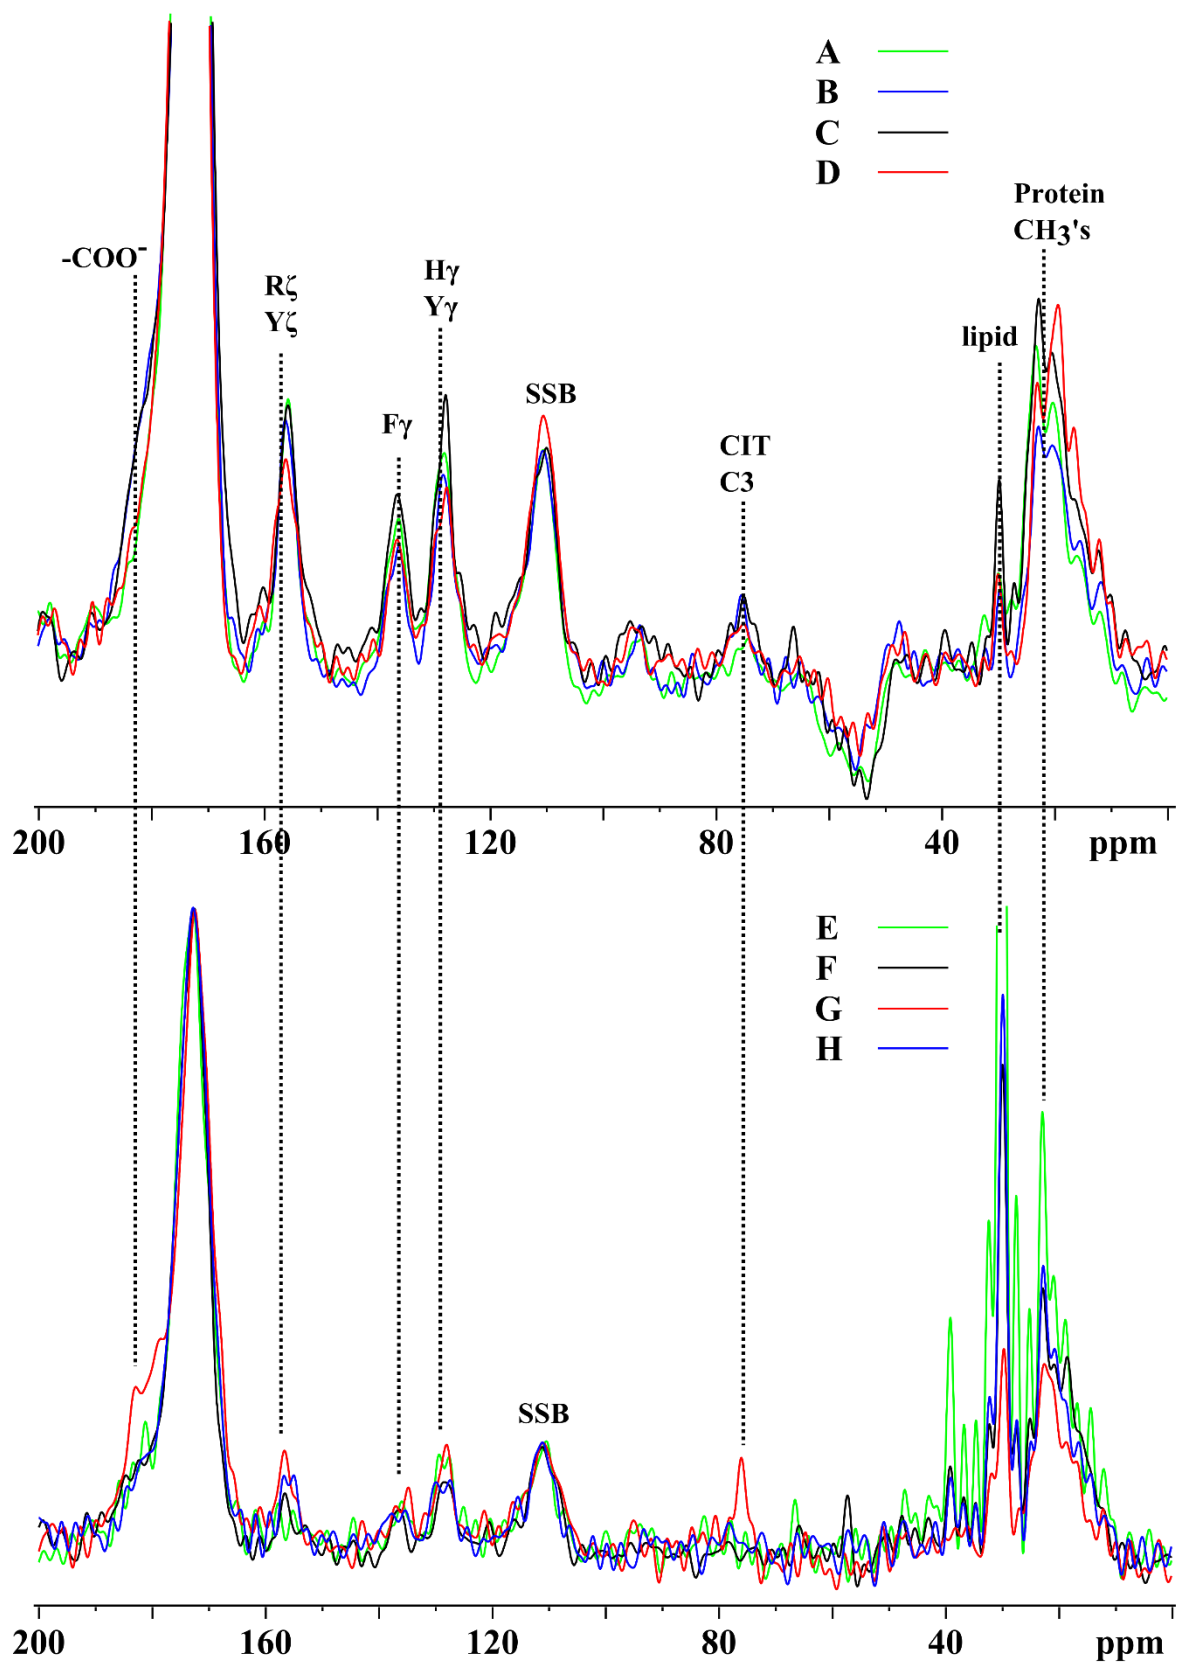

**Fig. S3** Overlays of the dipolar dephased (DD) spectra of all eight stones. SSSB – spinning side band.

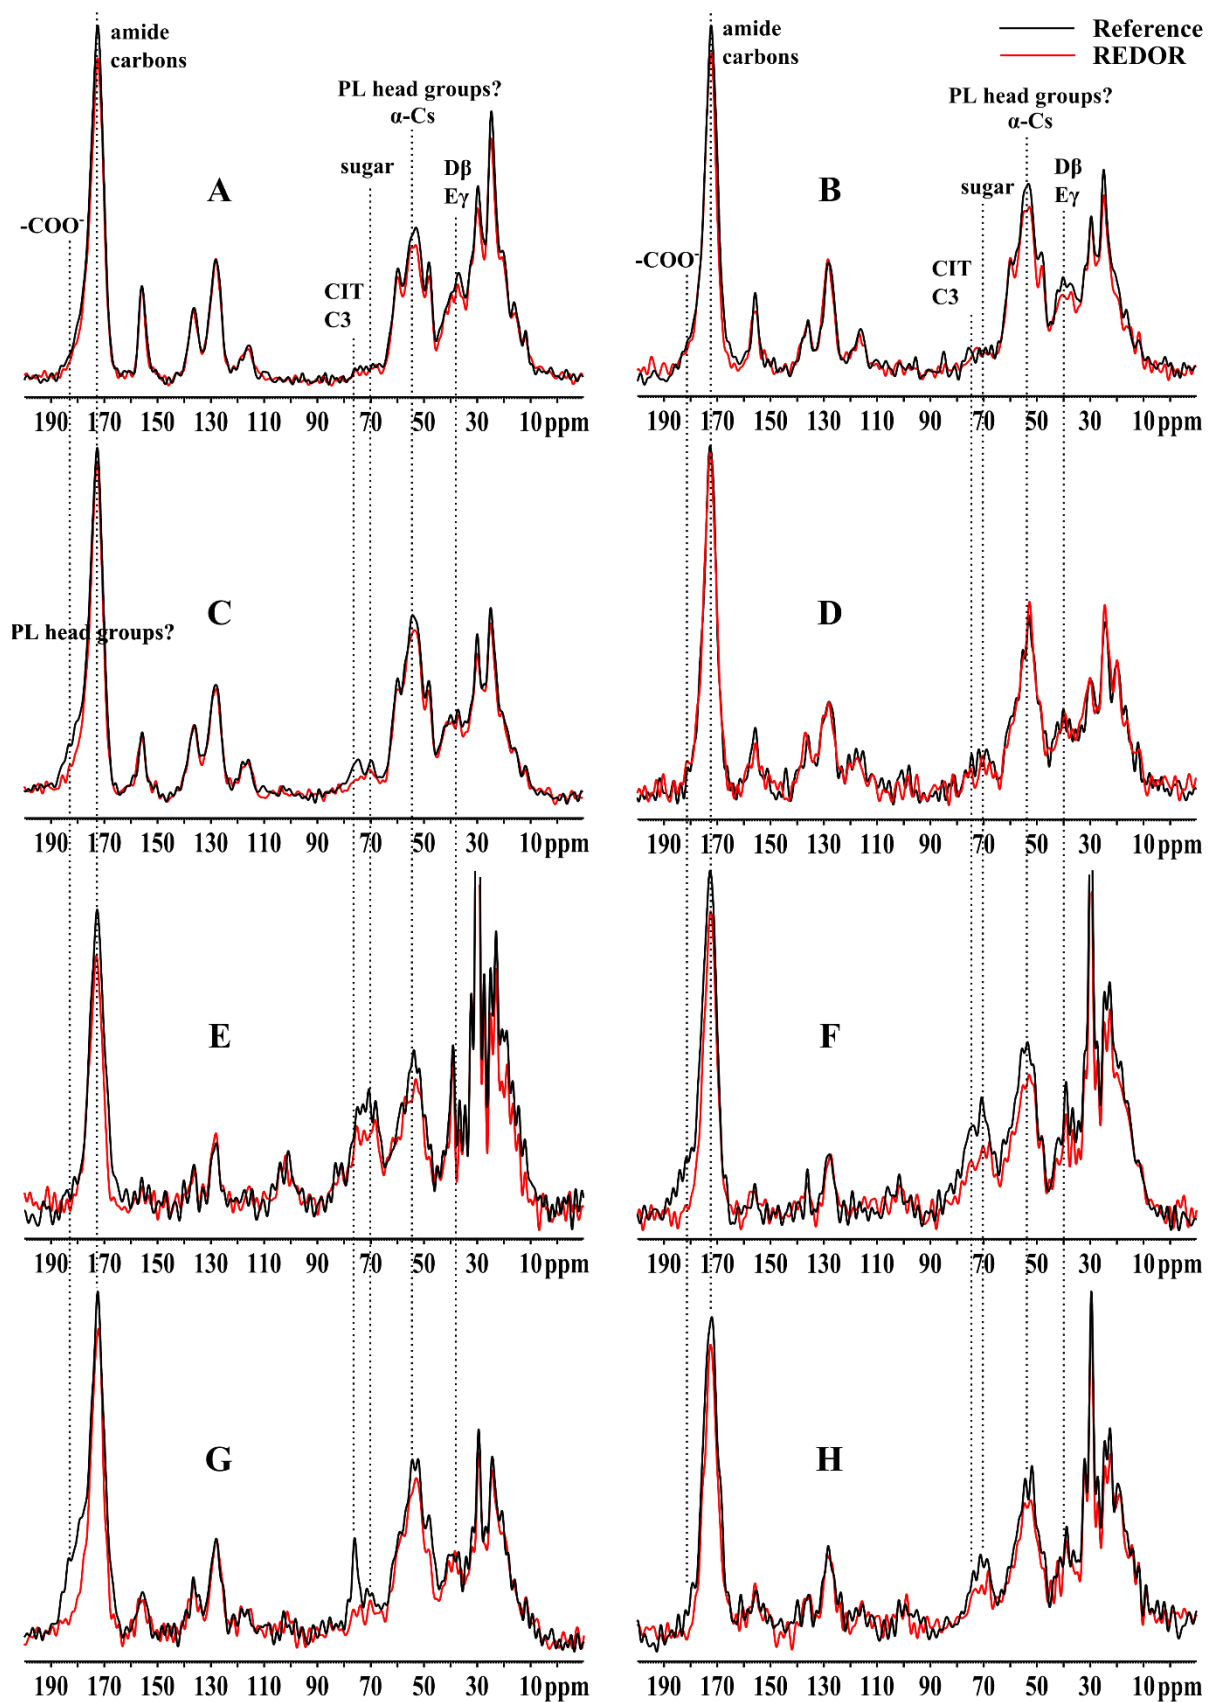

**Fig. S4** Overlays of the  $^{13}\text{C}\{^{31}\text{P}\}$  REDOR datasets of all eight stones.

**Table S1 Measured amino acid composition from each of two analyses per sample of the four stones analysed; meaned data for each stone appears in Table 1.**

| Amino acid | Sample / Mole % |       |       |       |       |       |       |       |
|------------|-----------------|-------|-------|-------|-------|-------|-------|-------|
|            | A               |       | B     |       | C     |       | D     |       |
|            | Run 1           | Run 2 | Run 1 | Run 2 | Run 1 | Run 2 | Run 1 | Run 2 |
| <b>Ala</b> | 2.6             | 2.9   | 2.1   | 3.7   | 3.5   | 3.8   | 5.0   | 5.1   |
| <b>Arg</b> | 7.7             | 7.8   | 7.8   | 7.6   | 8.2   | 8.1   | 7.0   | 7.0   |
| <b>Asp</b> | 5.4             | 5.5   | 4.5   | 5.7   | 6.1   | 6.1   | 9.4   | 9.3   |
| <b>Glu</b> | 15.5            | 14.8  | 16.3  | 14.5  | 14.1  | 14.1  | 10.7  | 10.5  |
| <b>Gly</b> | 9.8             | 9.8   | 9.5   | 9.1   | 9.6   | 9.5   | 10.5  | 10.3  |
| <b>His</b> | 5.9             | 6.0   | 4.9   | 4.3   | 7.5   | 7.3   | 8.4   | 8.5   |
| <b>Ile</b> | 3.3             | 3.4   | 3.2   | 4.4   | 3.4   | 3.5   | 3.3   | 3.4   |
| <b>Leu</b> | 5.2             | 5.3   | 5.0   | 6.2   | 4.9   | 5.1   | 6.6   | 6.6   |
| <b>Lys</b> | 4.0             | 4.1   | 3.8   | 4.1   | 4.9   | 5.0   | 6.0   | 6.0   |
| <b>Met</b> | 0.6             | 0.5   | 0.5   | 0.8   | 0.7   | 0.6   | 1.4   | 1.4   |
| <b>Phe</b> | 7.6             | 7.6   | 7.7   | 7.4   | 8.3   | 8.4   | 5.8   | 5.9   |
| <b>Pro</b> | 13.3            | 13.3  | 15.6  | 13.5  | 11.8  | 11.8  | 5.7   | 5.8   |
| <b>Ser</b> | 3.0             | 3.0   | 2.5   | 2.8   | 2.6   | 2.6   | 4.1   | 4.1   |
| <b>Thr</b> | 2.1             | 2.2   | 1.8   | 2.3   | 1.7   | 1.8   | 3.7   | 3.6   |
| <b>Tyr</b> | 10.7            | 10.4  | 11.6  | 9.6   | 9.5   | 8.8   | 6.7   | 6.6   |
| <b>Val</b> | 3.5             | 3.6   | 3.2   | 4.1   | 3.4   | 3.4   | 5.9   | 6.0   |

## Notes summarizing compositional data (by FT-IR), and NMR results

**A** Carapatite (50%)+proteins (35%)+whitlockite (15%)

NMR  $^{31}\text{P}$ : No low frequency shoulders.  $^{13}\text{C}$ : Small broad sugar signal. Small  $^{13}\text{C}\{^{31}\text{P}\}$  REDOR to 35 – 40 ppm and 50 – 60 ppm signal envelopes, and amides. Lipid not prominent.

**B** Carapatite (65%)+proteins (25%)+whitlockite (10%)

NMR  $^{31}\text{P}$ : Prominent shoulder ca. 1.3 and 0 ppm.  $^{13}\text{C}$ : Small citrate and sugar signals.  $^{13}\text{C}\{^{31}\text{P}\}$  REDOR to 35 – 40 ppm and 50 – 60 ppm signal envelopes, and amides. Lipid not prominent

**C** Carapatite (77%)+proteins (20%)+triglycerides (3%)

NMR  $^{31}\text{P}$ : No shoulders on HAp peak.  $^{13}\text{C}$ : Lipid not prominent; Citrate and sugar undergo  $^{13}\text{C}\{^{31}\text{P}\}$  REDOR as well as 50 – 60 ppm signal envelope, amides, and carboxylate.

**D** Carapatite (55%)+whitlockite (25%)+proteins (20%)

NMR  $^{31}\text{P}$ : Shoulder -0.5 – 0 ppm.  $^{13}\text{C}$ : Poor S/N, little  $^{13}\text{C}\{^{31}\text{P}\}$  REDOR, or lipid signal.

**E**: Salivary stone from a male patient aged 27 years living in Tahiti. Stone morphology: unusual. Stone composition: Carapatite (72%), Hydroxyapatite (10%)+Proteins (15%)+Lipids (probably triglycerides and/or esters of cholesterol and fatty acids) (3%).

NMR  $^{31}\text{P}$ : No shoulders on HAp peak  $^{13}\text{C}$ : Lipid very prominent.  $^{13}\text{C}\{^{31}\text{P}\}$  REDOR to sugars, 50 – 60 ppm signal envelope, amides, and possibly to lipid.

**F**: Salivary stone from a male patient aged 18 years. Stone morphology: IVa+VIb. Stone composition: Carapatite (80%), Proteins (20%).

NMR  $^{31}\text{P}$ : Shoulders at 1.1 ppm, -0.5 ppm  $^{13}\text{C}$ :  $^{13}\text{C}\{^{31}\text{P}\}$  REDOR to citrate and sugars, and 50 – 60 ppm signal envelope, amides, and carboxylates. Lipid present.

**G** Salivary stone from a male patient aged 72 years: Stone morphology: IVa+VIb. Stone composition: Carapatite (72%)+Hydroxyapatite (15%)+Proteins (13%).

NMR  $^{31}\text{P}$ : No shoulders on HAp peak  $^{13}\text{C}$ : Prominent citrate which undergoes strong  $^{13}\text{C}\{^{31}\text{P}\}$  REDOR, also  $^{13}\text{C}\{^{31}\text{P}\}$  REDOR to 35 – 40 ppm and 50 – 60 ppm signal envelopes, amides, and carboxylate.

**H** Salivary stone from a male patient. Stone morphology: IVa+VIb. Stone composition: Carapatite (88%)+Proteins (12%).

NMR  $^{31}\text{P}$ : No shoulders on HAp peak.  $^{13}\text{C}$ : Poor S/N but citrate and sugar undergo  $^{13}\text{C}\{^{31}\text{P}\}$  REDOR as well as 50 – 60 ppm signal envelope, amides, and carboxylate. Some lipid.
